# Supplementary material for: RehaBEElitation : the architecture and organization of a serious game to evaluate motor signs in Parkinson’s disease
Source: PeerJ journal article supplement (doi:10.7717/peerj-cs.1267), 2023-03-15

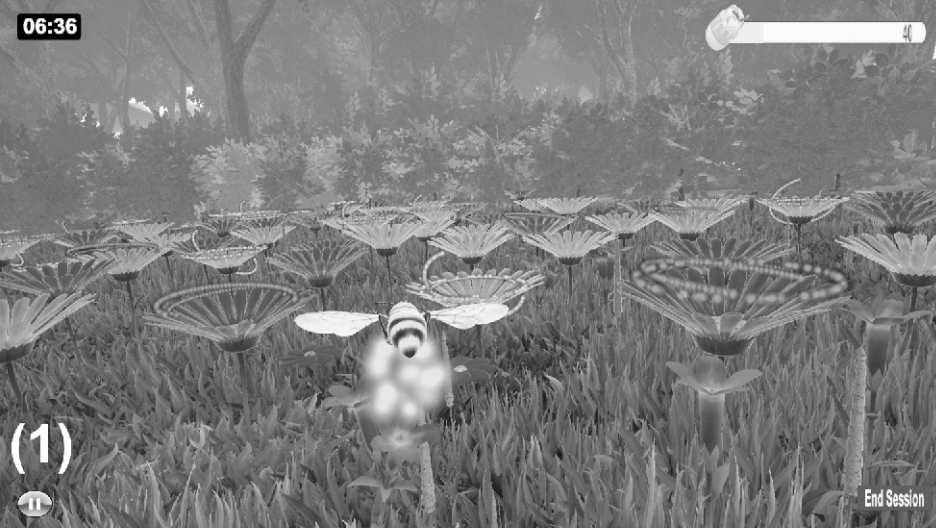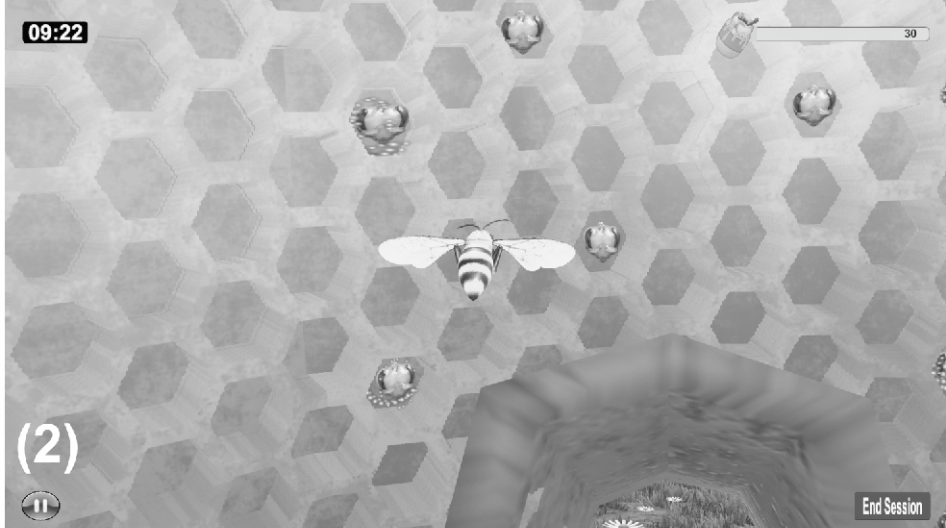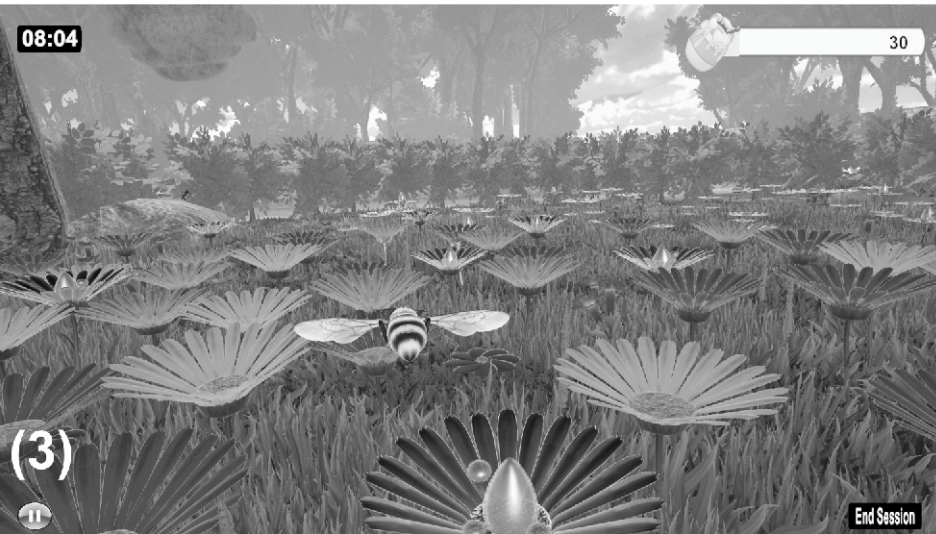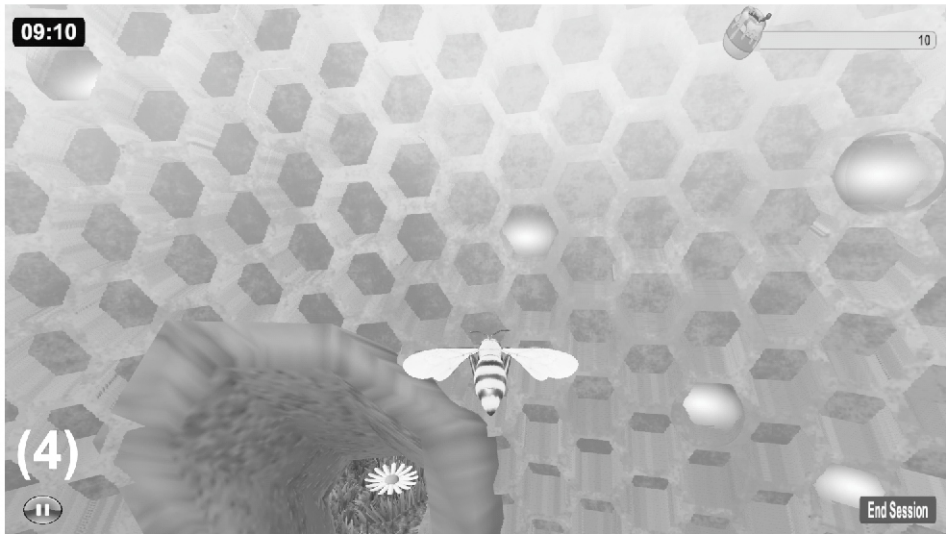

Supplement: Attachment2.pdf [file Attachment2.pdf]
