# Supplementary material for: RehaBEElitation : the architecture and organization of a serious game to evaluate motor signs in Parkinson’s disease
Source: PeerJ journal article supplement (doi:10.7717/peerj-cs.1267), 2023-03-15

<< RehaBEElitation >>

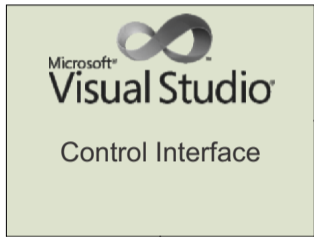

<< Serious Game >>

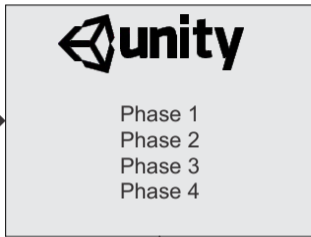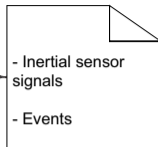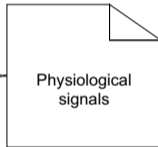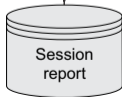

PostgreSQL

The PostgreSQL logo, consisting of a stylized elephant head, followed by the text "PostgreSQL".

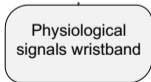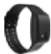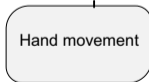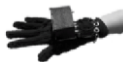

Supplement: Attachment6.pdf [file Attachment6.pdf]
