# Supplementary material for: RehaBEElitation : the architecture and organization of a serious game to evaluate motor signs in Parkinson’s disease
Source: PeerJ journal article supplement (doi:10.7717/peerj-cs.1267), 2023-03-15
Supplement: Attachment7.pdf [file Attachment7.pdf]

Therapist

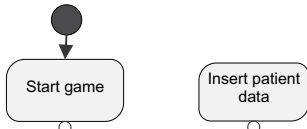

Patient Selection

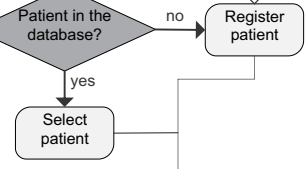

HMI Calibration

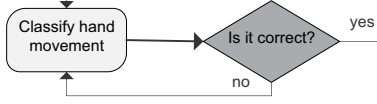

Training

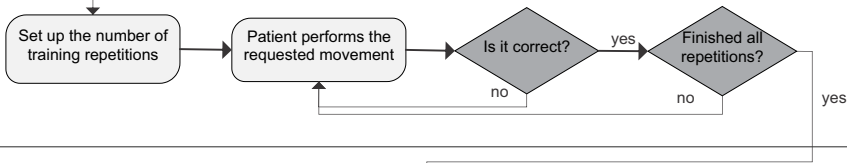

Phase 1  
Pollinating the flowers

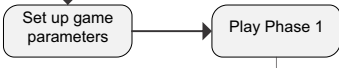

Phase 2  
Feeding the larvae

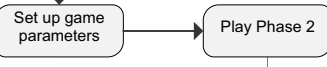

Phase 3  
Collecting the nectar

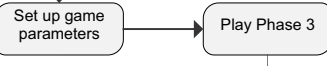

Phase 4  
Drying the nectar

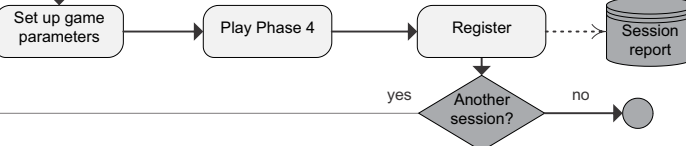

RehaBEEilitation
